# Supplementary material for: Response of soil respiration to nitrogen addition along a degradation gradient in a temperate steppe of northern China
Source: Copernicus journal article supplement (doi:10.5194/bg-2016-119), 2016-05-17
Supplement: Supplementary file 1 [file Table S1.pdf › Table S1.pdf]

Table S1. ANOVA of the effects of nitrogen addition and degradation degree on microbial biomass carbon, microbial biomass nitrogen, and soil organic carbon, soil total nitrogen, root carbon and nitrogen concentrations, soil pH, and above- and belowground biomass.

| Item                                                         | Term                   | Df | F- Value | P -Value |
|--------------------------------------------------------------|------------------------|----|----------|----------|
| Soil microbial<br>biomass carbon<br>(mg kg <sup>-1</sup> )   | N-treatment (N)        | 5  | 5.903    | < 0.001  |
|                                                              | Degradation status (D) | 3  | 33.463   | < 0.001  |
|                                                              | N×D                    | 15 | 3.569    | 0.001    |
| Soil microbial<br>biomass nitrogen<br>(mg kg <sup>-1</sup> ) | N                      | 5  | 3.254    | 0.014    |
|                                                              | D                      | 3  | 3.527    | 0.022    |
|                                                              | N×D                    | 15 | 2.212    | 0.021    |
| Soil organic<br>carbon content<br>(%)                        | N                      | 5  | 0.484    | 0.787    |
|                                                              | D                      | 3  | 115.009  | < 0.001  |
|                                                              | N×D                    | 15 | 0.268    | 0.996    |
| Soil total<br>nitrogen content<br>(%)                        | N                      | 5  | 0.491    | 0.781    |
|                                                              | D                      | 3  | 98.910   | < 0.001  |
|                                                              | N×D                    | 15 | 0.203    | 0.999    |
| Root carbon<br>concentration<br>(%)                          | N                      | 5  | 0.331    | 0.892    |
|                                                              | D                      | 3  | 5.794    | 0.002    |
|                                                              | N×D                    | 15 | 1.192    | 0.310    |
| Root nitrogen<br>concentration<br>(%)                        | N                      | 5  | 2.836    | 0.025    |
|                                                              | D                      | 3  | 0.455    | 0.715    |
|                                                              | N×D                    | 15 | 0.965    | 0.505    |
| pH                                                           | N                      | 5  | 16.475   | < 0.001  |
|                                                              | D                      | 3  | 10.508   | < 0.001  |
|                                                              | N×D                    | 15 | 1.243    | 0.275    |
| Belowground<br>biomass (g<br>m <sup>-2</sup> )               | N                      | 5  | 0.761    | 0.583    |
|                                                              | D                      | 3  | 1.487    | 0.230    |
|                                                              | N×D                    | 15 | 1.518    | 0.136    |
| Aboveground<br>biomass(g m <sup>-2</sup> )                   | N                      | 5  | 3.077    | 0.017    |
|                                                              | D                      | 3  | 41.582   | < 0.001  |
|                                                              | N×D                    | 15 | 1.946    | 0.041    |
